# Supplementary material for: Combined deletions of IHH and NHEJ1 cause chondrodystrophy and embryonic lethality in the Creeper chicken
Source: PubMed Central journal article supplement (PMC7096424; doi:10.1038/s42003-020-0870-z), 2020-03-25
Supplement: 42003_2020_870_MOESM1_ESM.pdf [file 42003_2020_870_MOESM1_ESM.pdf]

## Supplementary Figures

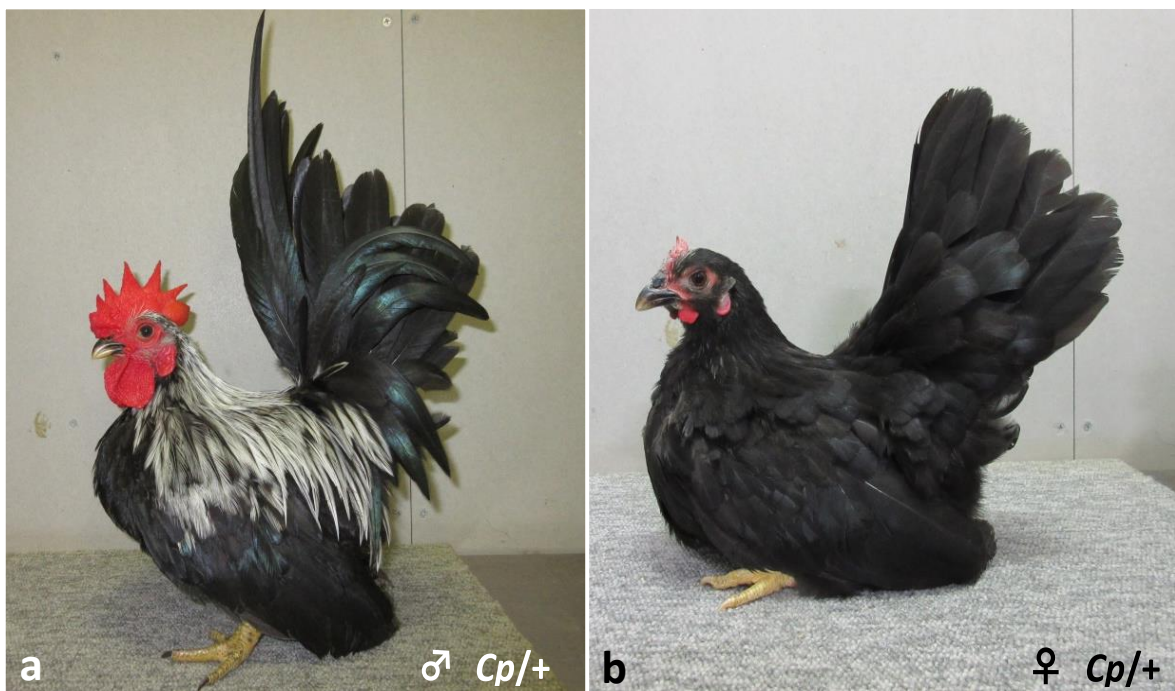

**Supplementary Fig. 1** Phenotypes of Creeper chickens. Whole body images of heterozygous ( $Cp/+$ ) male (**a**) and female (**b**) from the Japanese bantam (JB) strain.

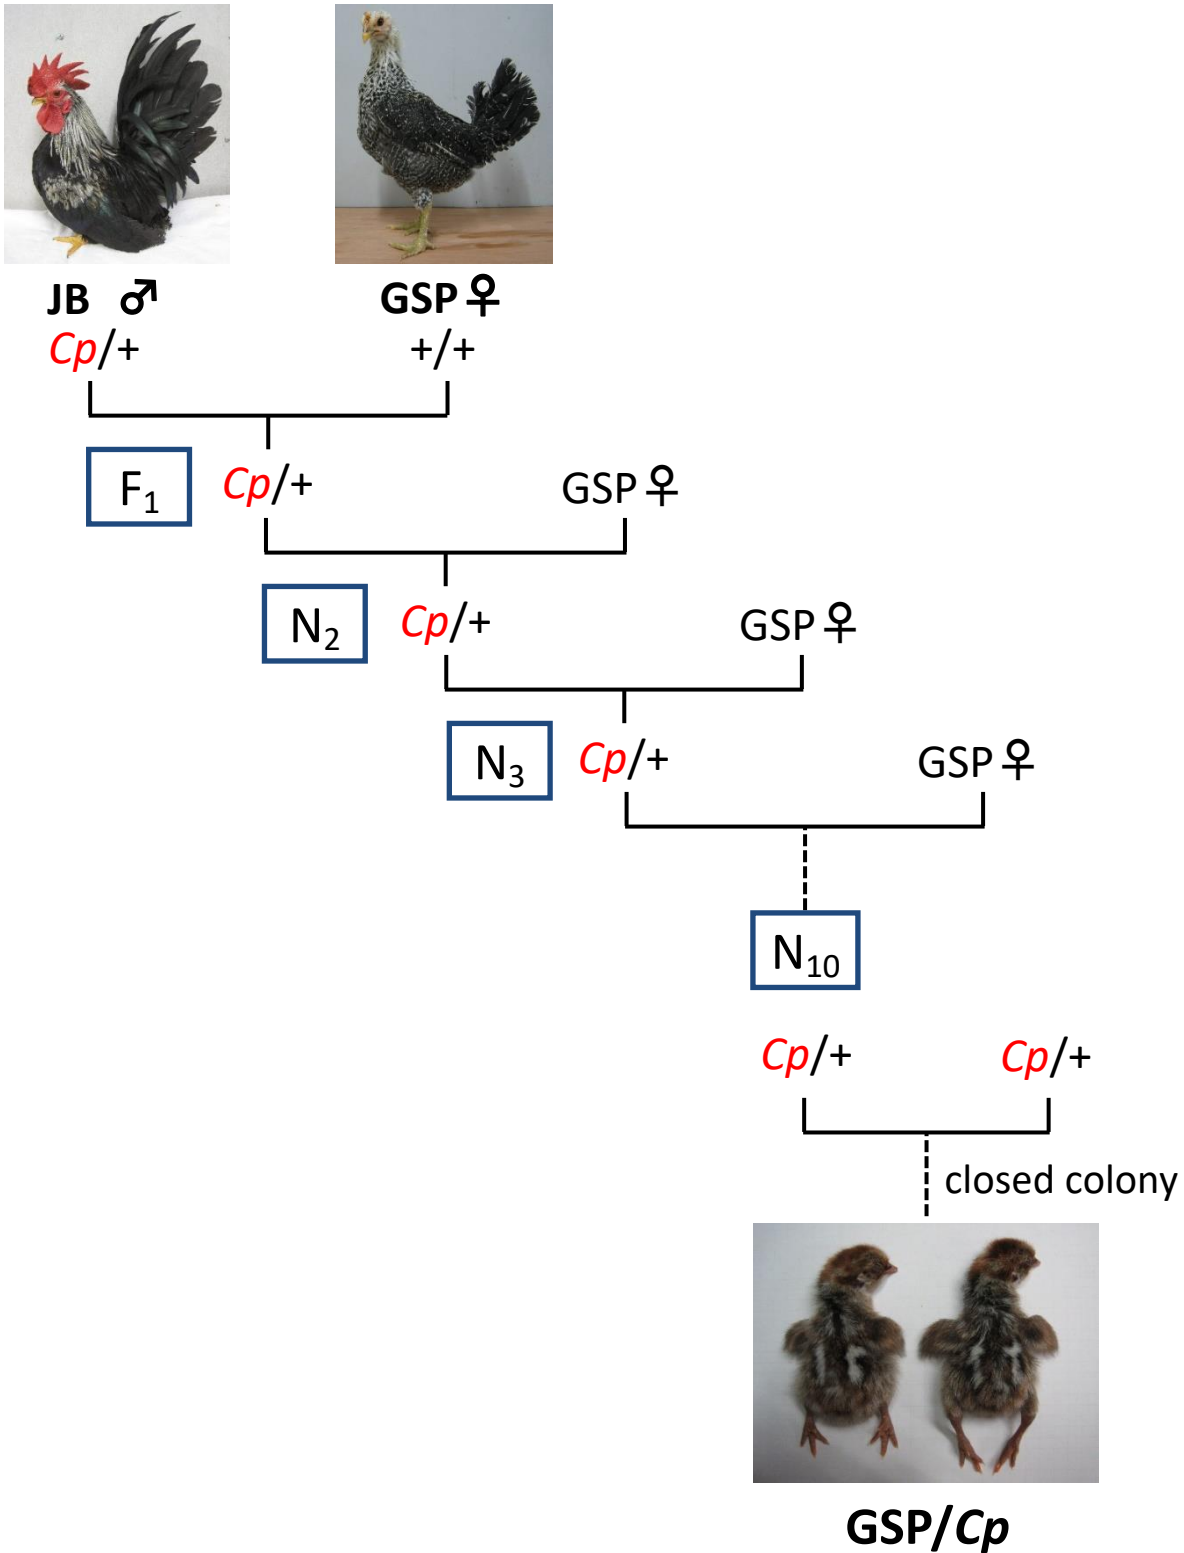

**Supplementary Fig. 2** Mating scheme for establishing a congenic strain of the *Cp* gene (GSP/*Cp*). F<sub>1</sub> hybrids were obtained by mating a female of the GSP strain with a male of the JB strain that was heterozygous for the *Cp* allele. The congenic strain of the *Cp* gene in the GSP genetic background was established by backcrossing an F<sub>1</sub> hybrid male to GSP females, followed by backcrossing with GSP females eight times. This strain has been maintained as a closed colony.

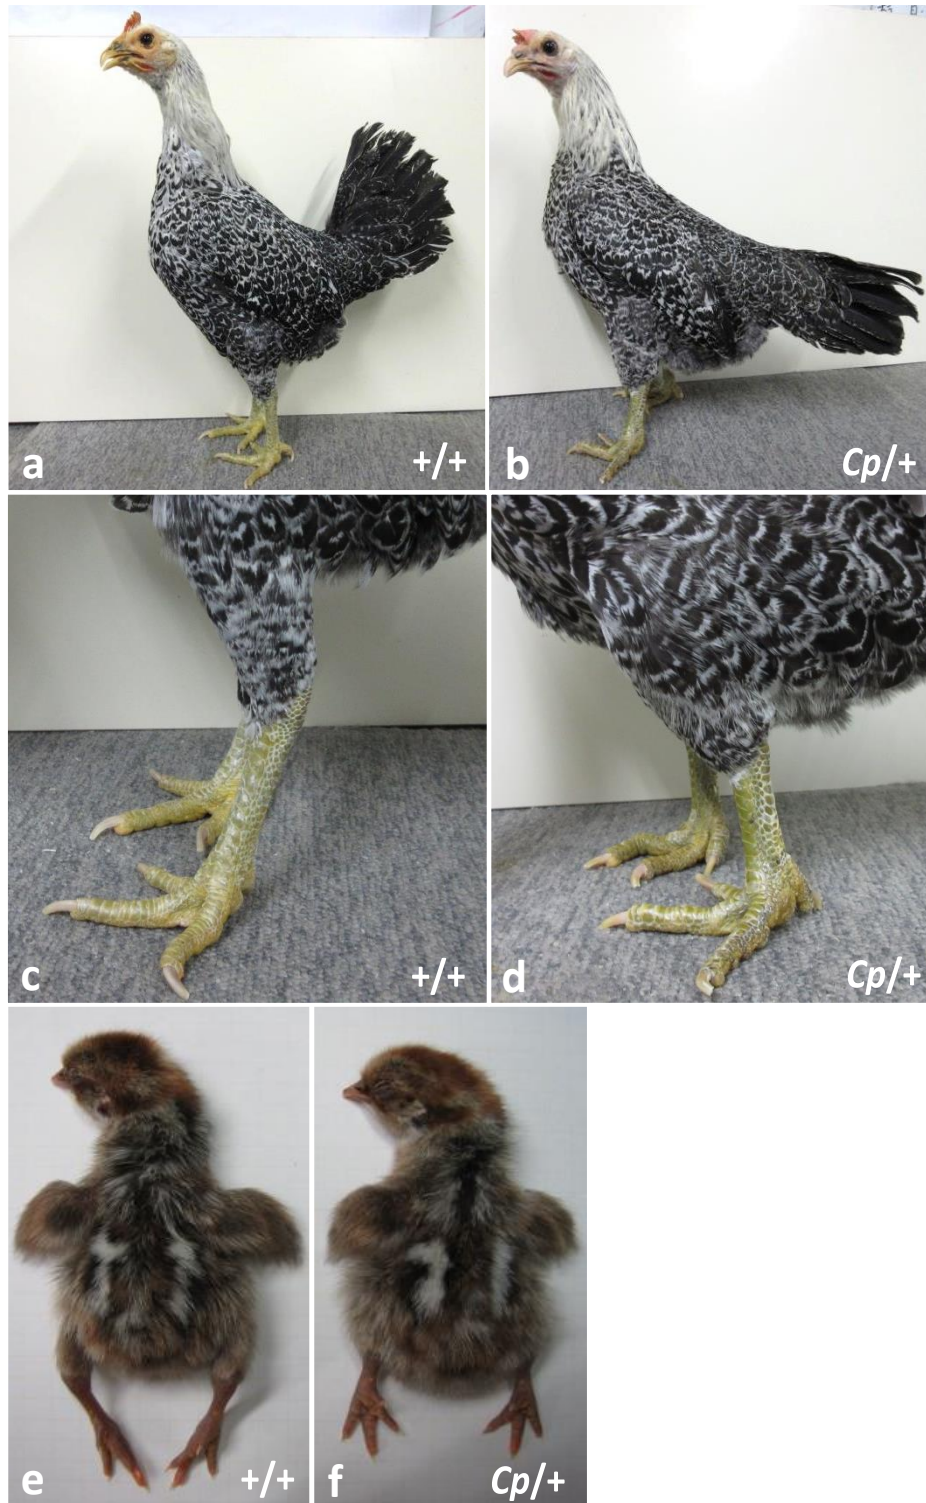

**Supplementary Fig. 3** Phenotypes of the wild-type and Creeper chickens in the congenic GSP/*Cp* strain. **a–d** Pictures of whole bodies and legs of a wild-type chicken (+/+) (**a, c**) and a Creeper chicken (*Cp*/+) (**b, d**). The legs of the Creeper chicken (**d**) are shorter than those of the wild-type chicken (**c**). **e, f** A wild-type chick (+/+) (**e**) and a Creeper chick (*Cp*/+) (**f**) 1 day after hatching.

**a**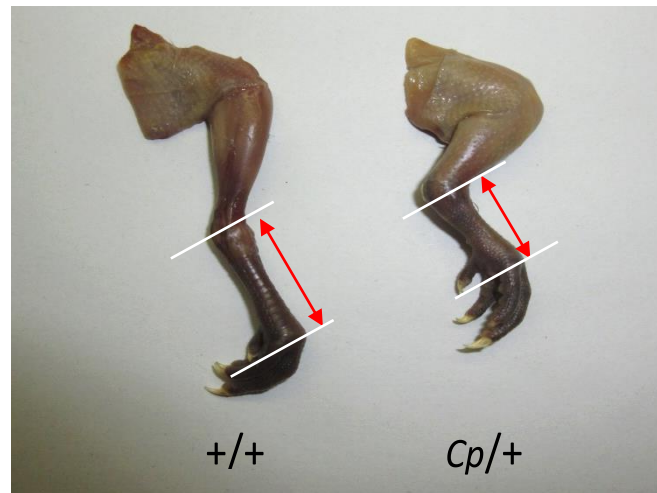**b**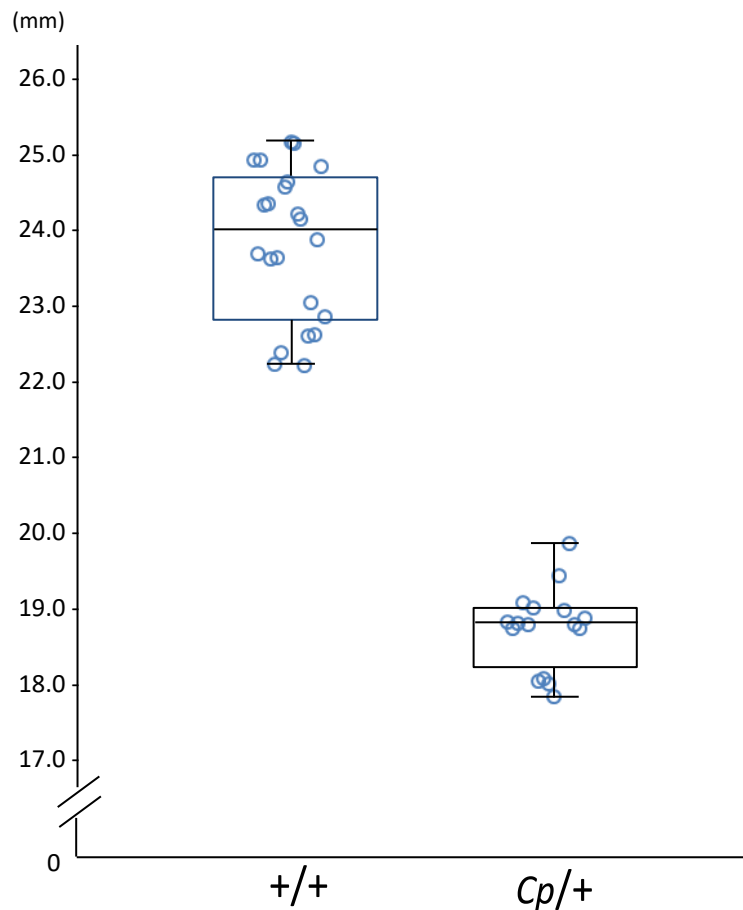

**Supplementary Fig. 4** Shank lengths of the wild-type and Creeper chicks in the GSP/*Cp* strain. **a** The right legs of a wild-type chick (+/+) and a Creeper chick (*Cp*/+) 1 day after hatching. The lengths of metatarsal bones (double-headed arrows) were measured using an electronic caliper. **b** Boxes and whisker plots show the lengths of metatarsal bones of wild-type chicks (+/+,  $n = 22$ ) and Creeper chicks (*Cp*/+,  $n = 16$ ). Error bars extend to the maximum and minimum values of each group. The shank length of Creeper chicks was approximately 20% shorter (average = 18.8 mm) than that of the wild-type chicks (average = 23.9 mm) (Welch's t-test,  $P = 1.55 \times 10^{-20}$ ).

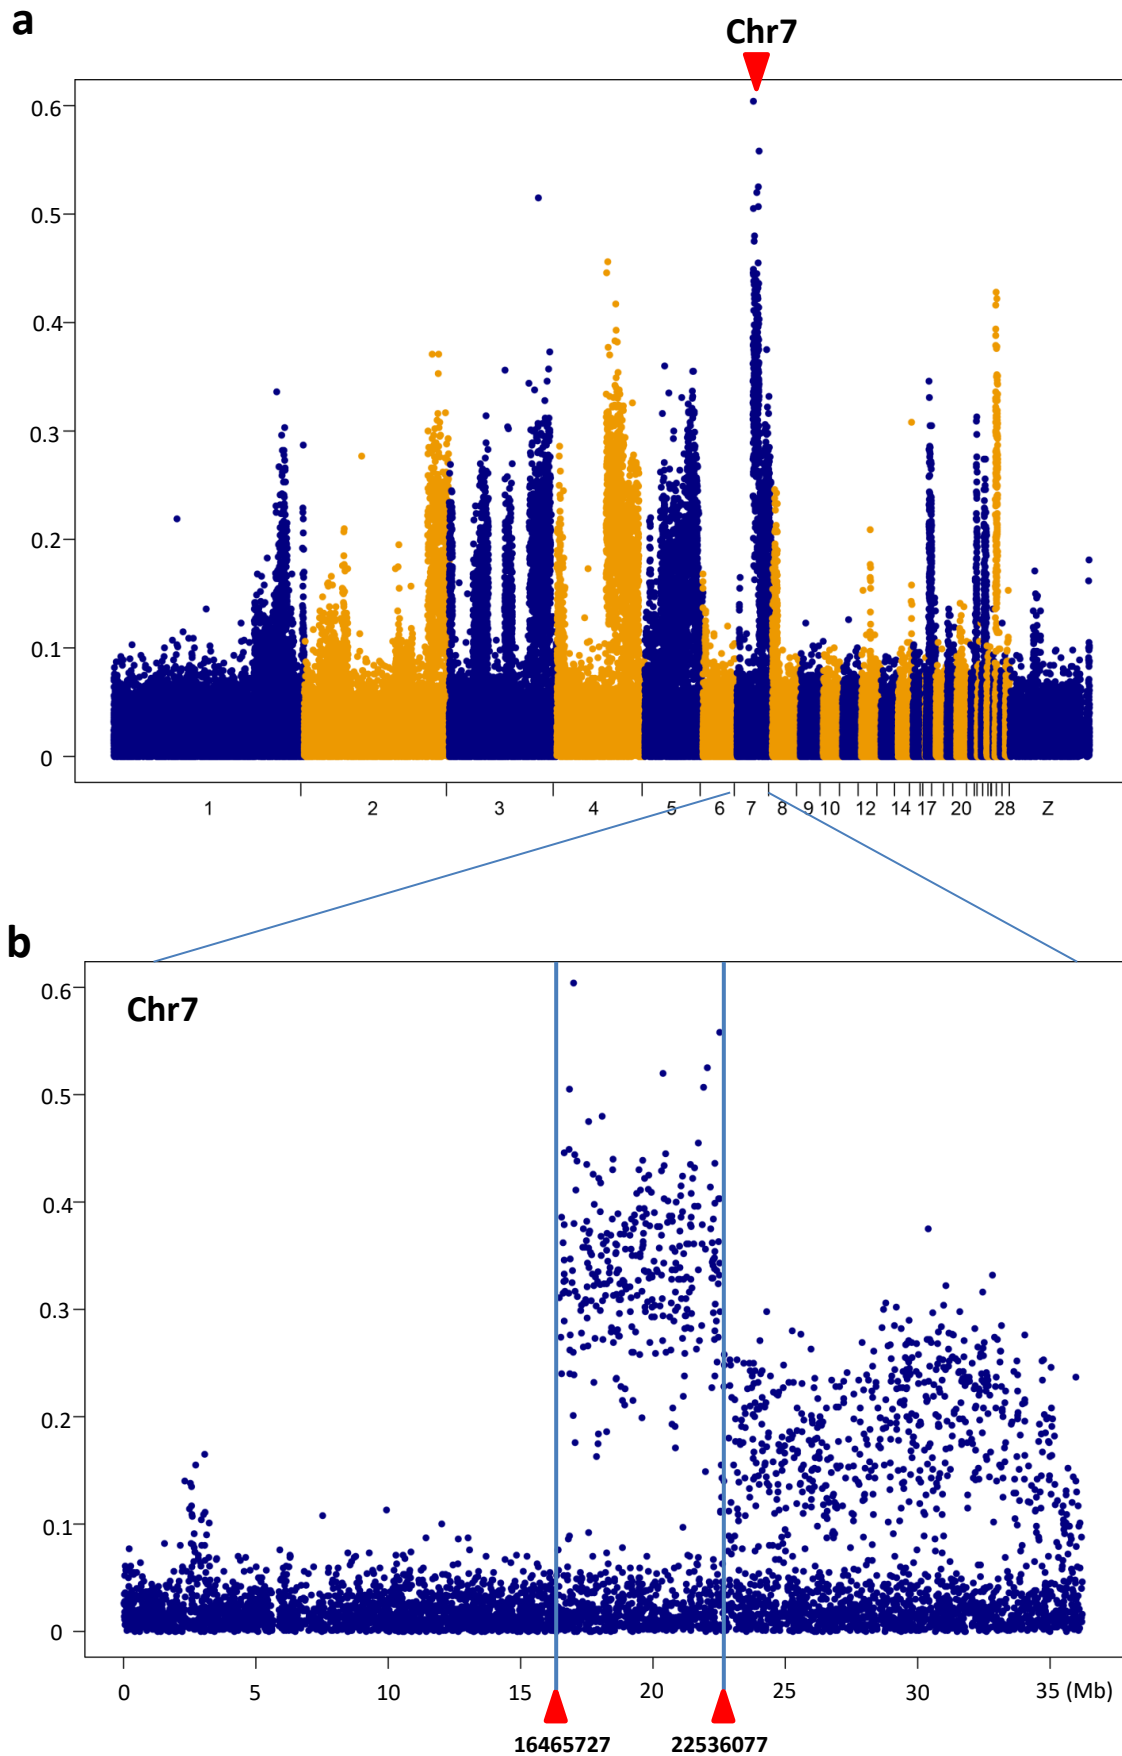

**Supplementary Fig. 5** Distribution of genome-wide absRAFdif values obtained using a 600K genome-wide SNP array. **a** The highest peak of absRAFdif values between the wild-type (+/+) and heterozygous (*Cp*/+) chickens located on chromosome 7. **b** The peak of absRAFdif values was localized within 6.1 Mb at nucleotide position 16465727 – 22536077 in the chicken reference genome *Gallus\_gallus*-4.0 (17032895 – 23162069 in *Gallus\_gallus*-5.0).

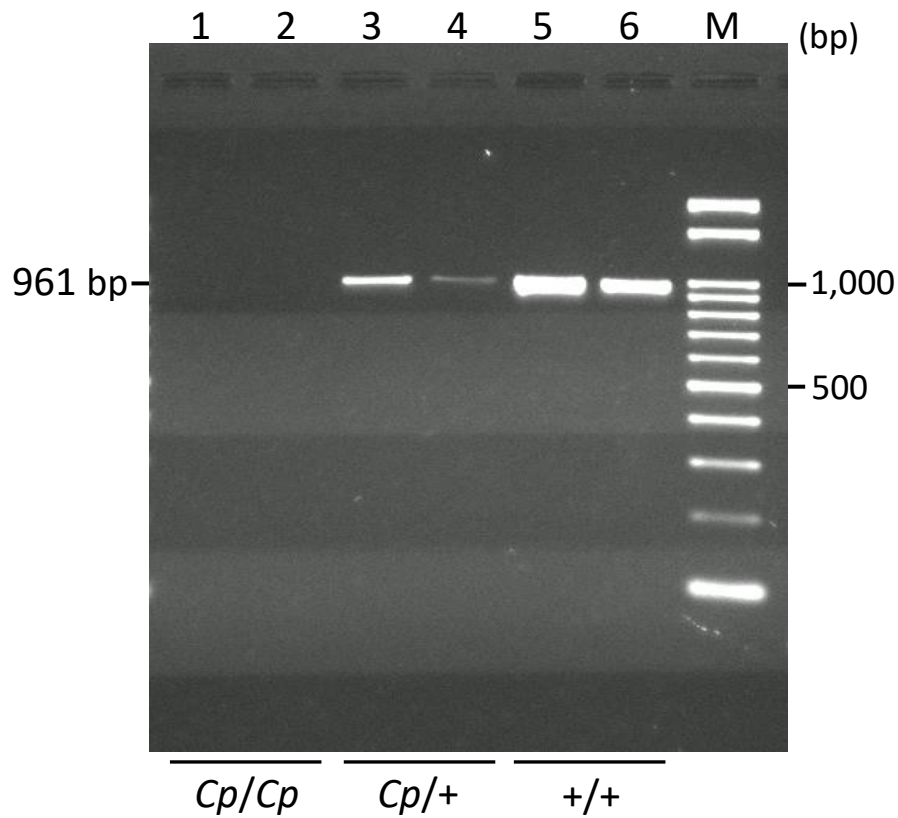

**Supplementary Fig. 6** Detection of the genomic deletion of the *IHH* gene at the *Cp* locus. The 961 bp fragment was amplified from the wild-type (+/+) and heterozygous (*Cp*/+) chickens, but not amplified in the *Cp/Cp* homozygous embryos using a pair of primers designed in the fifth intron and sixth exon of the *IHH* gene. M, molecular size marker: Gene Ladder 100 (0.1 – 2 kbp) (NIPPON GENE, Tokyo, Japan).

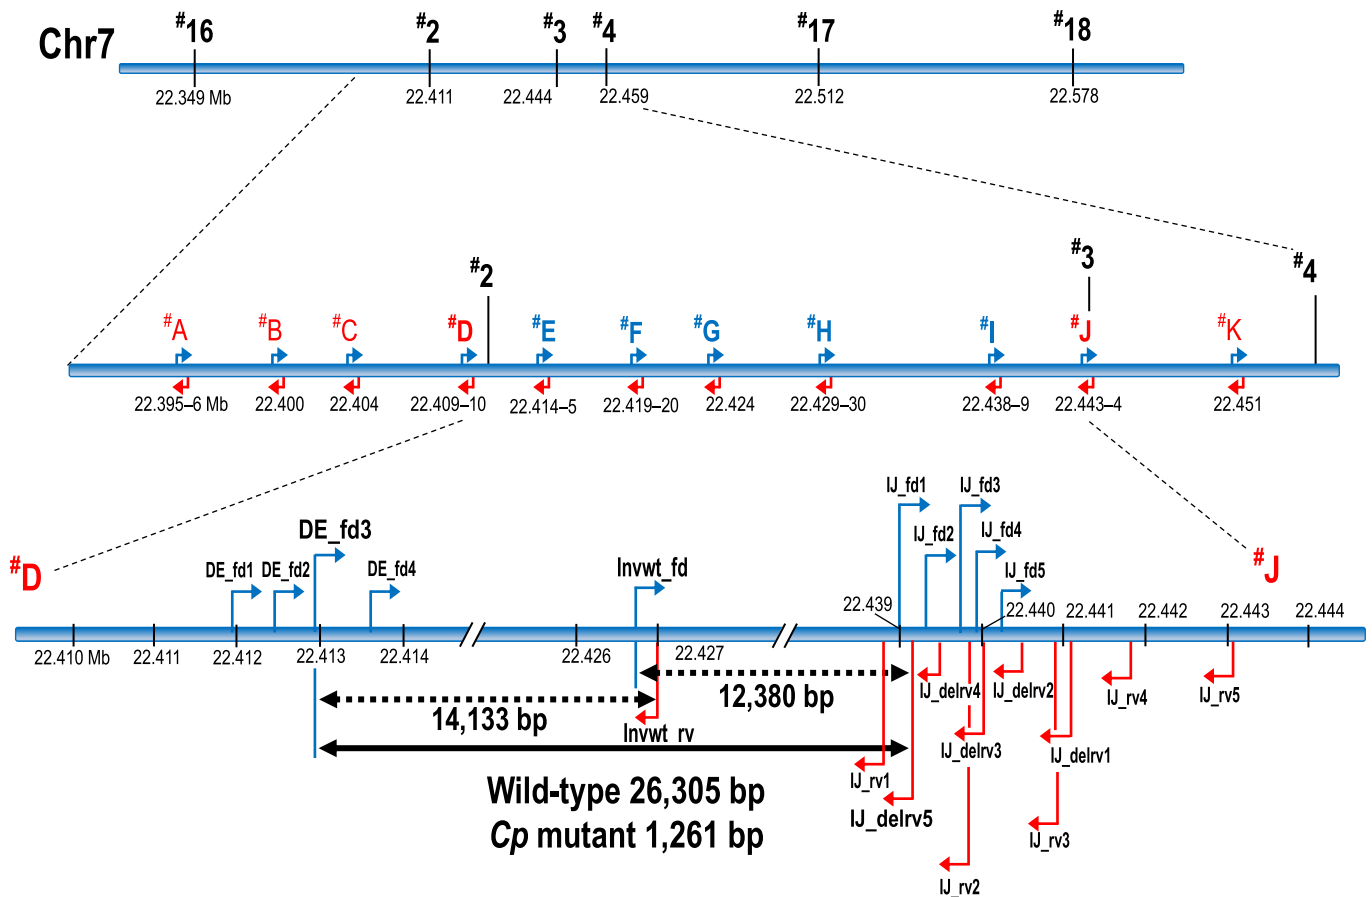

**Supplementary Fig. 7** The locations of PCR primers used for detecting deletions at the *Cp* locus. Six SNPs (#2, #3, #4, #16, #17, and #18) in the vicinity of the *Cp* locus were used as anchors for detecting deletions. The key-shaped arrows indicate the positions of PCR primers.

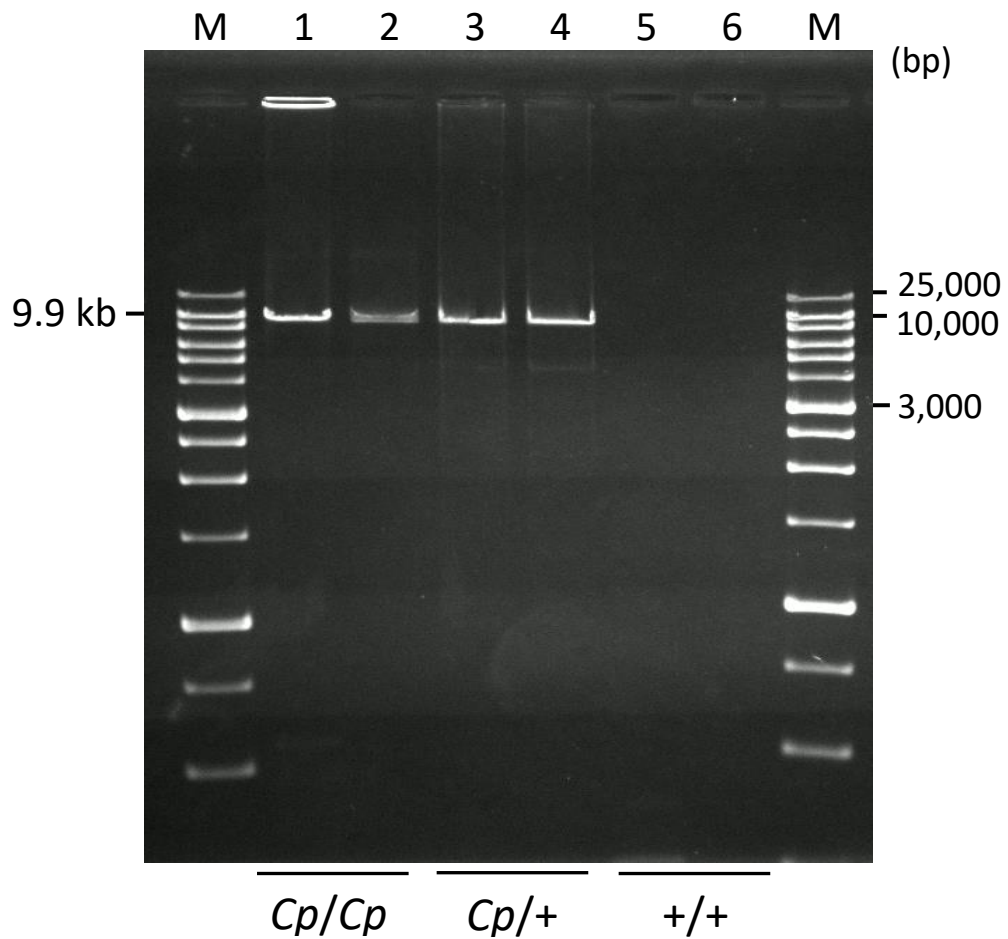

**Supplementary Fig. 8** PCR amplification for detecting the deletion at the *Cp* locus. A 9.9 kb PCR product was only amplified from the *Cp/+* chickens and the *Cp/Cp* embryos but not in the wild-type (+/+) chickens by LA-PCR using primers #D\_fd and #J\_rv in the 35 kb region at 22.409 – 22.444 Mb in *Gallus\_gallus*-5.0. M, molecular size marker: ExcelBand XL 25 kb DNA Ladder, Broad Range (up to 25 kb) (SMOBIO Technology, Hsinchu, Taiwan).



→ DE\_fd3 (22412905–22412930)

TTCGTTTTCT GGCAACATGC AGCTCCGAGC TGAGCGCATT GGTCAGGCTG 50  
 TGGCAGAGGC TTGGGCTCCC AGTGCTGTCC CCTGGCTGCT CCCGTGCTCC 100  
 GAAAAATGTA ATGGTGTCT TCCAGCATCA CTGCCAGACC AGTTTCATCC 150  
 CTCTCTGGCT GCGCTTCCAC CTTGCCAAGC AGGGTAAGCT GGCACCACGG 200  
 GCACACCTGT GCCTGGCTGA AGCTGGTAGC AATTCGGAGA GATCCAGAGG 250  
 CAGATGTCCT GCGCCTTGG TGCTCTGTCT TTCTGCTCCT CCAGCCAAAA 300

22413167

22413168–22426650 (13,483 bp)

22426651

TCTGTCTCCA TCACCCAGCG CGGACCTGCA GCTATTCCAG CCTGGCCctc 13750  
 ccgtgtgccc acccgaggga tgtgaggga cgtcccggcc gaggcgggtgt 13800  
 gcgtagggt gtcccagggt gctgcctcac ctgggaaggc cacagggaac 13850  
 ttgcaggggt gcaggcagag tgcagcogga cccctcccc ggcgtgcage 13900

→ Invwt\_fd (22426831–22426858)

tgggggagac tcaggggggc cccggaacc ctcgtcctg aatcagggt 13950  
 gttgtattta ctttccctt ttggcagcta gaagggaag cccatcccag 14000  
 cccctcattg ttgtctcagc gagttaatca gatgccataa tcctgtgtg 14050  
 gaaatcctgg gctccctgg aaacaatgg gagcgagaat atgtgtgta 14100  
 aattcaacc agctgcotcc ctcgtctgtt tgatccccgc ccgcaggccc 14150

← Invwt\_rv (22427010–22427037)

ggccccttg cgagcggcg gcgcggcgg ggccggagcc ccgggggtgc 14200  
 cacctcgtgc ccgggggtgt cccgttgcg gggggcgtcg ggcccggcg 14250  
 gcggcgggg cgcccagag ggcaggtgg cgggtgggc tgcggggctc 14300  
 ggccgggtgg aggaggctgc ggcGGCCCG GGGCAGGTTG CGCGGGGAGG 14350

22427228

22427229–22438789 (11,561 bp)

22438790

GGCGCAGAGT GGTCTGTGCT GAGCCAACAC TCCAGGAATT TAATTTGTTT 25900  
 AATATATCC CTGGGAAAGA AGAAAATAA TAAGTGGCAC CTTGCGTGCC 25950  
 CCCATGGCTC ACTCTCGAA CGGAGGTGTC AGCTTAACGA GCCGAAGCCC 26000  
 TCAGCTGAT TAACCAGCCG CTGCTCCCGC TAATAGGGAG CCACCGAGCC 26050  
 GCGTGATTGA TGAAGGGAG CATTACCCA GCAGCACGCT GCTGCGAGGA 26100  
 GGTGCTGTGC CTCAGCCCC TGCTCTGCC CAGGCACAGG TCAAGGGCAG 26150  
 AGACGGCTCC CACCTCCCTG GGCAGATCCC TCTGCCCCAC TGCTTGCCA 26200  
 GGCCGGCTT CGGACTGCA TGGCTGAGT CTGGGTCTTG GCCTTGCTCT 26250  
 TCCCTGAGGC CGCGTGGGA CACTGAGGCA CAGGGATGTT GACAGGCCAA 26300

GTGCTT

← IJ\_delrv5 (22439184–22439209)

Wild-type 14,133 bp  
 Cp mutant unamplified

Wild-type 12,380 bp  
 Cp mutant unamplified

**Supplementary Fig. 9** The nucleotide sequence of the 1,261 bp fragment amplified from the *Cp/Cp* embryos with primers DE\_fd3 and IJ\_delrv5. The inverted 578 bp sequence remains in the 25 kb deleted region in the *Cp* allele, which is located between nucleotide positions 22413167 and 22438790.

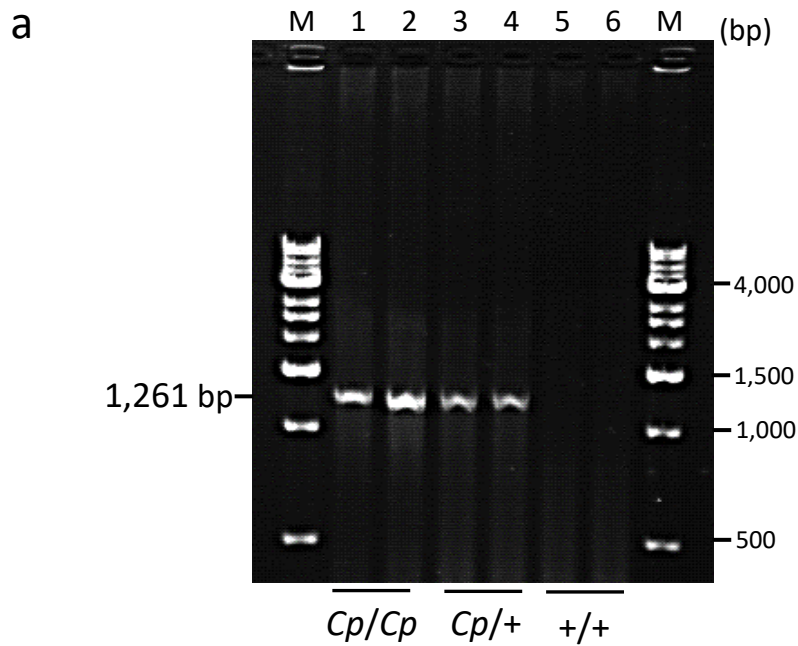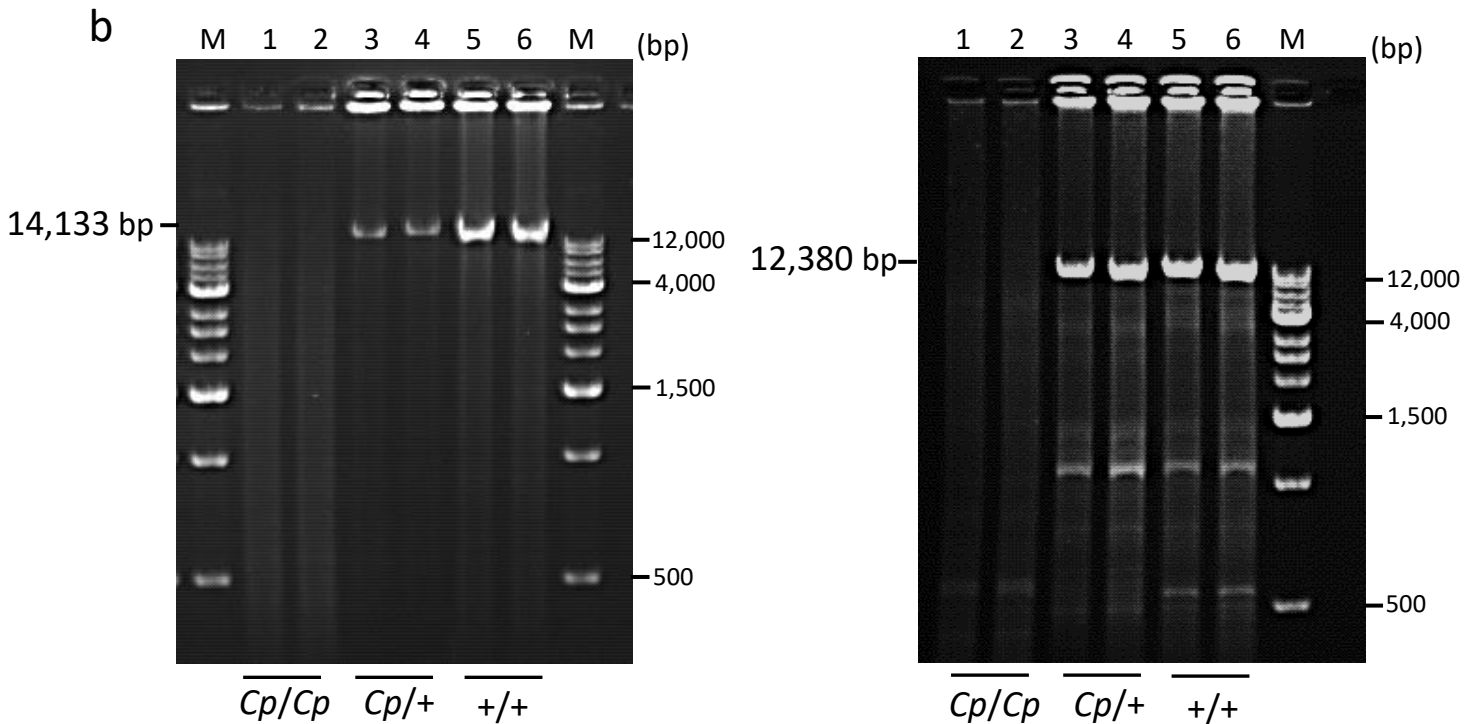

**Supplementary Fig. 10** PCR amplification for detecting the deletion at the *Cp* locus. **a** A 1,261 bp PCR product was only amplified from the *Cp/+* chickens and the *Cp/Cp* embryos but not in the wild-type (*+/+*) chickens by LA-PCR using primers DE\_fd3 and IJ\_delrv5 in the 26 kb region at 22.413 – 22.439 Mb in *Gallus\_gallus*-5.0. **b** 14,133 bp (left) and 12,380 bp (right) PCR products were only amplified from the wild-type (*+/+*) and *Cp/+* chickens but not in the *Cp/Cp* embryos by LA-PCR using DE\_fd3 and Invwt\_rv primer pair and Invwt\_fd and IJ\_delrv5 primer pair, respectively (see Supplementary Fig. S8 and Supplementary Table 9). M, molecular size marker: DL10001 DNA ladder (500 – 12,000 bp) (Generay Biotech, Shanghai, China).

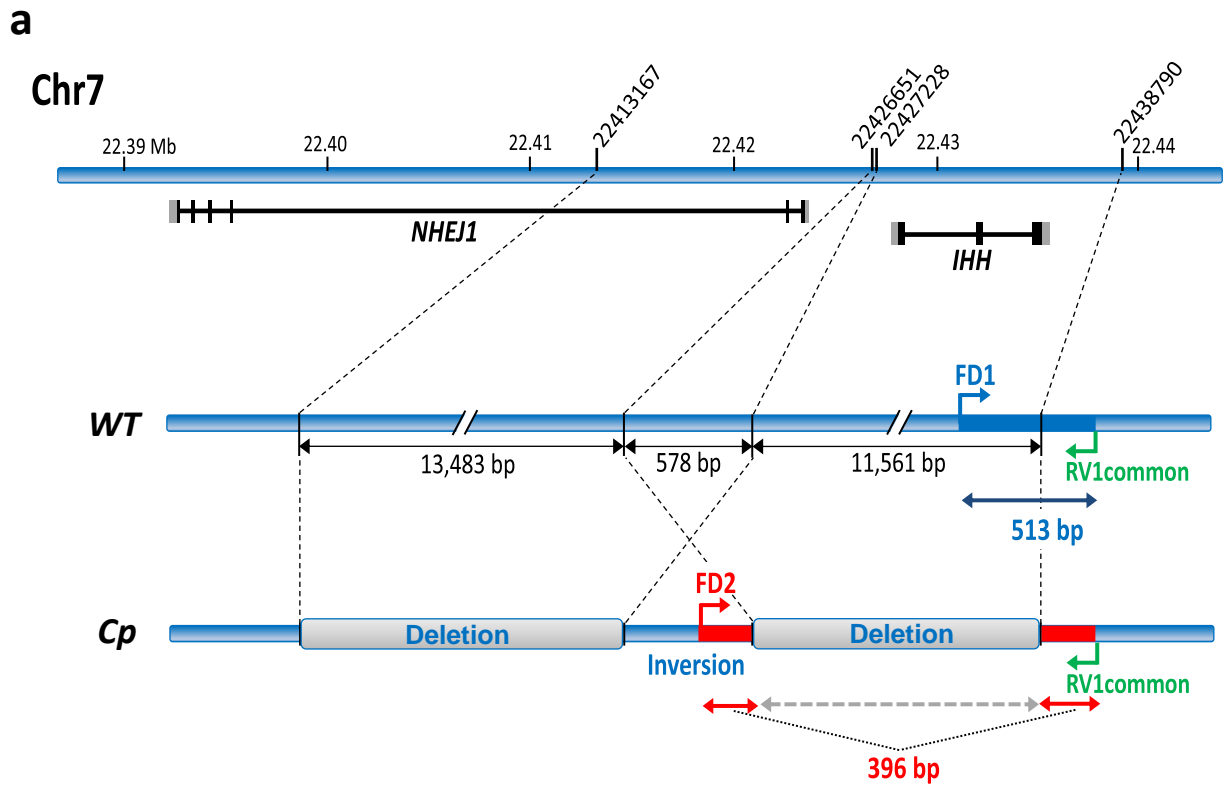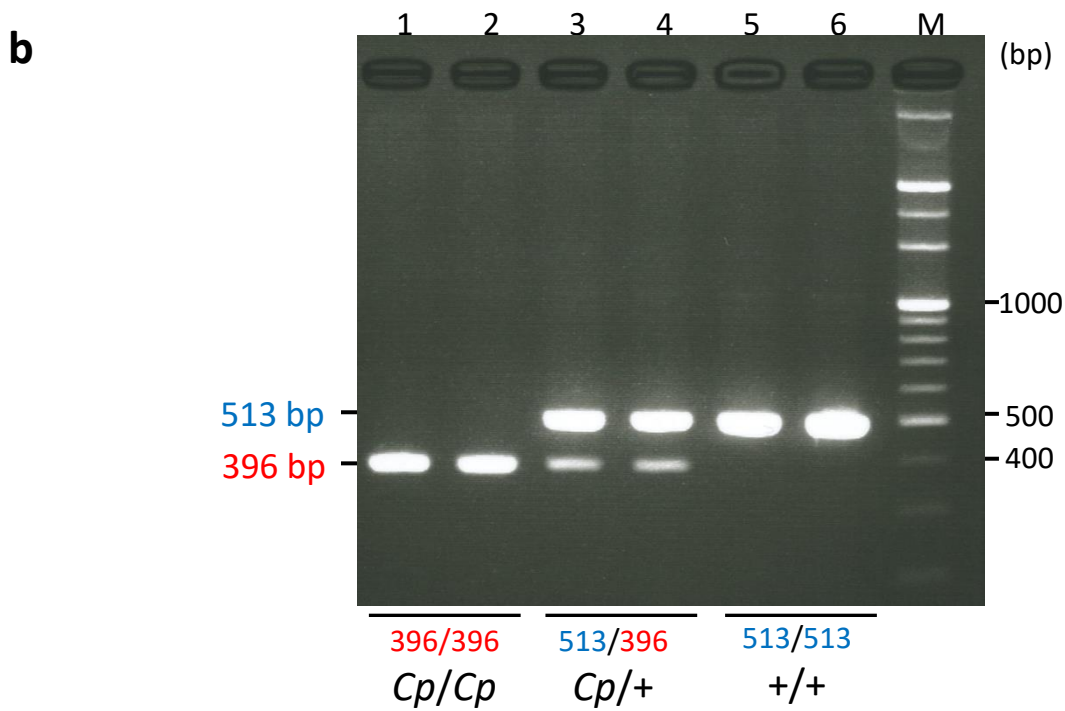

**Supplementary Fig. 11** Genotyping of the wild-type and Creeper alleles using a PCR assay. **a** A physical map of two deletions and the remaining inverted fragment in the deleted region at the *Cp* locus. The breakpoints located in the fourth intron of *NHEJ1* and behind the 3' UTR of *IHH*. The key-shaped arrows indicate the positions of PCR primers, FD1, FD2, and RV1common, used for genotyping. **b** Electrophoretic pattern of the DNA fragments amplified from the three genotypes. A 513 bp fragment was amplified from the wild-type allele by primers FD1 and RV1common, and a 396 bp fragment from the *Cp* allele by primers FD2 and RV1common. M, molecular size marker: Gene Ladder 100 (0.1 – 2 kbp) (NIPPON GENE, Tokyo, Japan).

## Supplementary Tables

**Supplementary Table 1** Segregation of Creeper and wild-type phenotypes in F<sub>1</sub>, F<sub>2</sub>, and backcross progeny that were obtained from mating between the JB line and the two wild-type strains, PNP/DO and GSP

| Mating                                           |                                                    | No. of progeny | Phenotype of progeny |           | Expected ratio | $\chi^2$ | <i>P</i>       |
|--------------------------------------------------|----------------------------------------------------|----------------|----------------------|-----------|----------------|----------|----------------|
| Male (Expected genotype)<br>(No. of individuals) | Female (Expected genotype)<br>(No. of individuals) |                | Creeper              | Wild-type |                |          |                |
| JB ( <i>Cp</i> /+) (1)                           | PNP/DO (++) (1)                                    | 2              | 1                    | 1         | –              | –        | –              |
| F <sub>1</sub> ( <i>Cp</i> /+) (1)               | F <sub>1</sub> (++) (1)                            | 113            | 56                   | 57        | 1 : 1          | 0.009    | <i>P</i> <0.05 |
| JB ( <i>Cp</i> /+) (1)                           | GSP (++) (1)                                       | 24             | 10                   | 14        | 1 : 1          | 0.667    | <i>P</i> <0.05 |
| F <sub>1</sub> ( <i>Cp</i> /+) (2)               | F <sub>1</sub> ( <i>Cp</i> /+) (4)                 | 175            | 118                  | 57        | 2 : 1          | 0.043    | <i>P</i> <0.05 |
| F <sub>1</sub> ( <i>Cp</i> /+) (2)               | F <sub>1</sub> (++) (2)                            | 120            | 62                   | 58        | 1 : 1          | 0.133    | <i>P</i> <0.05 |
| F <sub>1</sub> ( <i>Cp</i> /+) (1)               | GSP (++) (1)                                       | 15             | 7                    | 8         | 1 : 1          | 0.067    | <i>P</i> <0.05 |

**Supplementary Table 2** Genotyping of the 25 kb deletion (del) at the *Cp* locus in the E2.5 – 3.0 embryos from mating between *Cp*/+ heterozygotes from the GSP/*Cp* congenic strain, and morphological characteristics of the embryos

| Stage of developemt     | No. of embryos examined | No. of dead embryos | No. of live embryos | Morphology of live embryos |       |         |          |       |         |
|-------------------------|-------------------------|---------------------|---------------------|----------------------------|-------|---------|----------|-------|---------|
|                         |                         |                     |                     | Normal                     |       |         | Abnormal |       |         |
|                         |                         |                     |                     | +/+                        | del/+ | del/del | +/+      | del/+ | del/del |
| E2.5 – 3.0 <sup>a</sup> | 110                     | 4                   | 106                 | 27                         | 43    | 3       | 3        | 3     | 27      |

<sup>a</sup> Collected 3 days after the start of incubation

**Supplementary Table 3** Classification of morphological abnormalities in the E2.5 – 3.0 embryos obtained from a mating between *Cp* /+ heterozygotes from the GSP/*Cp* congenic strain

| Genotype | No. of abnormal embryos <sup>a</sup> | Morphological abnormality |                                 |                  |
|----------|--------------------------------------|---------------------------|---------------------------------|------------------|
|          |                                      | Hypoplasia of brain       | Abnormal blood island formation | Heart hypoplasia |
| +/+      | 3                                    | 3                         | 0                               | 0                |
| del/+    | 3                                    | 1                         | 2                               | 0                |
| del/del  | 27                                   | 26                        | 19                              | 23               |

<sup>a</sup> Collected 3 days after the start of incubation in the experiment shown in Supplementary Table 2

**Supplementary Table 4** Eighteen haplotype regions that showed high absRAFdif values between the wild-type (+/+) chickens from the GSP strain and the heterozygous (*Cp*/+) chickens from the GSP/*Cp* strain by SNP genotyping assay

| Chromosome | Nucleotide position <sup>a</sup> |           | Median of absRAFdif values | Haplotype block size (Mb) |
|------------|----------------------------------|-----------|----------------------------|---------------------------|
|            | 5' region                        | 3' region |                            |                           |
| 7          | 16465727                         | 22536077  | 0.335                      | 6.1                       |
| 26         | 394415                           | 2705165   | 0.24                       | 2.3                       |
| 4          | 50446006                         | 69851627  | 0.221                      | 19.4                      |
| 7          | 22677582                         | 35976759  | 0.191                      | 13.3                      |
| 3          | 81609740                         | 104480421 | 0.187                      | 22.9                      |
| 2          | 126787922                        | 148326478 | 0.181                      | 21.5                      |
| 17         | 3395054                          | 6096006   | 0.178                      | 2.7                       |
| 4          | 2426384                          | 3874078   | 0.172                      | 1.4                       |
| 3          | 53045                            | 3228287   | 0.171                      | 3.2                       |
| 4          | 70002537                         | 83960114  | 0.171                      | 14                        |
| 5          | 15847877                         | 55356475  | 0.167                      | 39.5                      |
| 3          | 30919389                         | 40051721  | 0.164                      | 9.1                       |
| 21         | 5795548                          | 6763857   | 0.159                      | 1                         |
| 1          | 170335509                        | 177682674 | 0.157                      | 7.3                       |
| 3          | 57002224                         | 64541911  | 0.149                      | 7.5                       |
| 23         | 2762047                          | 5694912   | 0.147                      | 2.9                       |
| 8          | 2310802                          | 5061393   | 0.141                      | 2.8                       |
| 1          | 193871308                        | 194405013 | 0.128                      | 0.5                       |

<sup>a</sup> Nucleotide position in the reference genome *Gallus\_gallus*-4.0

**Supplementary Table 5** Primer sets of 16 SNP markers used for mapping the *Cp* locus on chromosome 7

| Marker   |         | Nucleotide sequence of primer (5' to 3') | SNP position<br>(Gallus_gallus-4.0) | SNP position<br>(Gallus_gallus-5.0) | SNP <sup>a</sup><br>(JB/GSP) | Size of PCR<br>product (bp) | Annealing<br>temperature (°C) | Restriction enzyme<br>(No. of restriction sites)  |
|----------|---------|------------------------------------------|-------------------------------------|-------------------------------------|------------------------------|-----------------------------|-------------------------------|---------------------------------------------------|
| CHR7_#5  | Forward | AAACAAGACAGAGCCAGCTTCC                   | 2523701                             | 2555424                             | C/T                          | 458                         | 59.5                          | <i>Pst</i> I (1)                                  |
|          | Reverse | TTGGGTCGTGTAGATAGGCAAG                   |                                     |                                     |                              |                             |                               |                                                   |
| CHR7_#6  | Forward | AGAAAGACATGCAGCCACAGAG                   | 7468194                             | 7977228                             | C/A                          | 424                         | 59.5                          | <i>Eco</i> RI (1)                                 |
|          | Reverse | TTGGGCTTAGCAAAACAGCACC                   |                                     |                                     |                              |                             |                               |                                                   |
| CHR7_#19 | Forward | ACCATATTTCTTCAATAAG                      | 15711523                            | 16274591                            | C/T                          | 317                         | 47.5                          | <i>Hin</i> dIII (1)                               |
|          | Reverse | AGCTTGACTACTACGTGAGC                     |                                     |                                     |                              |                             |                               |                                                   |
| CHR7_#8  | Forward | AGGTAGAGTCTGTAGGTCTCAG                   | 17462758                            | 18049452                            | C/T                          | 438                         | 59.5                          | <i>Pst</i> I (1)                                  |
|          | Reverse | TGGTCATAATGAGTGGCAGCAG                   |                                     |                                     |                              |                             |                               |                                                   |
| CHR7_#9  | Forward | AAGTGCTCCCAAGTAGGATCAG                   | 19709516                            | 20305921                            | A/G                          | 459                         | 59.5                          | <i>Pst</i> I (1)                                  |
|          | Reverse | ACTTACCCTTCCACTCTCCTAC                   |                                     |                                     |                              |                             |                               |                                                   |
| CHR7_#14 | Forward | TTCAGTGGGATTTCTCAGGAGC                   | 21435690                            | 22049676                            | T/G                          | 758                         | 59.5                          | <i>Pst</i> I (1)                                  |
|          | Reverse | TCTCTTCAGGAGATTGAGACGG                   |                                     |                                     |                              |                             |                               |                                                   |
| CHR7_#15 | Forward | TGTCCTCGTAAACGAAGCTCAG                   | 21647789                            | 22268282                            | A/G                          | 732                         | 58.5                          | <i>Nme</i> AIII (1)                               |
|          | Reverse | ATGCCCATGATCATGTGCATG                    |                                     |                                     |                              |                             |                               |                                                   |
| CHR7_#16 | Forward | TAAAAGCTGGACTGCTGTAGCC                   | 21726140                            | 22348862                            | T/G                          | 662                         | 59.5                          | <i>Nde</i> I (1)                                  |
|          | Reverse | TTCCTTCAGGAAGCCGATGAAG                   |                                     |                                     |                              |                             |                               |                                                   |
| CHR7_#2  | Forward | AACTGTGAGCCGATGAAGCAAG                   | 21783101                            | 22411354                            | A/G <sup>b</sup>             | 654                         | 59.5                          | <i>Bci</i> VI (1)                                 |
|          | Reverse | AGCACAACCGGCTTCCAATTAG                   |                                     |                                     |                              |                             |                               |                                                   |
| CHR7_#3  | Forward | AGATTTTCTCCAGCTCTCGTGG                   | 21815955                            | 22444190                            | C/T <sup>b</sup>             | 656                         | 59.5                          | <i>Pml</i> I (1)                                  |
|          | Reverse | AAACCTTCTTGCTCCTGCATGC                   |                                     |                                     |                              |                             |                               |                                                   |
| CHR7_#4  | Forward | ATTTCTCCAGGAGCTGCATGGG                   | 21830848                            | 22458582                            | C/G                          | 449                         | 59.5                          | <i>Pvu</i> II (2 sites including 1 common site)   |
|          | Reverse | TCACAGGAACTTCGGAGGCAG                    |                                     |                                     |                              |                             |                               |                                                   |
| CHR7_#17 | Forward | ATGTGGGAGTACCATGTCATGC                   | 21884855                            | 22512418                            | T/C                          | 782                         | 59.5                          | <i>Tsp</i> 45I (1)                                |
|          | Reverse | AGCCCCATAGGGAAACTCTTTC                   |                                     |                                     |                              |                             |                               |                                                   |
| CHR7_#18 | Forward | ACTCAGCACCTTTAGGACTTGC                   | 21951698                            | 22578237                            | T/C                          | 922                         | 59.5                          | <i>Hph</i> I (2 sites including 1 common site)    |
|          | Reverse | AGCCAGCAAGTATGGGATTTCC                   |                                     |                                     |                              |                             |                               |                                                   |
| CHR7_#11 | Forward | TTCCAAGTGAAGTCCACCATCTC                  | 23830947                            | 24456802                            | T/C                          | 486                         | 59.5                          | <i>Pst</i> I (1)                                  |
|          | Reverse | TCCTCTCTTCAGGGTAGAAGG                    |                                     |                                     |                              |                             |                               |                                                   |
| CHR7_#12 | Forward | ATCACTGAGAGGCTTCTCGTTG                   | 30424765                            | 31088900                            | C/G                          | 456                         | 59.5                          | <i>Hin</i> dIII (2 sites including 1 common site) |
|          | Reverse | ATTGACCACTCAGAAGGCTCTG                   |                                     |                                     |                              |                             |                               |                                                   |
| CHR7_#13 | Forward | AGCTGTCCAGGAAAGCCTTATC                   | 35185180                            | 35875738                            | A/G                          | 424                         | 59.5                          | <i>Pst</i> I (1)                                  |
|          | Reverse | AAGCAGGTTTGCACCTTGGTAGG                  |                                     |                                     |                              |                             |                               |                                                   |

<sup>a</sup> SNPs detected between the JB strain and the GSP strain<sup>b</sup> SNPs detected between the JB strain and the GSP strain in the deleted region



**Supplementary Table 6** Linkage analysis of the *Cp* locus using 16 SNP markers and three microsatellite markers on chromosome 7

| Marker              | Position of marker<br>(Gallus_gallus-4.0) | Position of marker<br>(Gallus_gallus-5.0) | Rough mapping using 95 F <sub>2</sub> progeny |           | Marker              | Position of marker<br>(Gallus_gallus-5.0) | Fine mapping using 175 F <sub>2</sub> progeny |             |      |
|---------------------|-------------------------------------------|-------------------------------------------|-----------------------------------------------|-----------|---------------------|-------------------------------------------|-----------------------------------------------|-------------|------|
|                     |                                           |                                           | Map distance (cM)                             | LOD score |                     |                                           | Map distance (cM)                             | LOD score   |      |
| CHR7_#5             | 2523701                                   | 2555424                                   |                                               |           |                     |                                           |                                               |             |      |
|                     |                                           |                                           | 21.6                                          | 8.7       |                     |                                           | –                                             | –           |      |
| CHR7_#6             | 7468194                                   | 7977228                                   |                                               |           |                     |                                           |                                               |             |      |
|                     |                                           |                                           | 29.6                                          | 3.0       |                     |                                           | –                                             | –           |      |
| CHR7_#19            | 15711523                                  | 16274591                                  |                                               |           | CHR7_#19            | 16274591                                  | }                                             | 8.6         | 33.8 |
| CHR7_#8             | 17462758                                  | 18049452                                  | 3.8                                           | 19.5      |                     |                                           |                                               |             |      |
| CHR7_#9             | 19709516                                  | 20305921                                  | 2.1                                           | 19.0      |                     |                                           |                                               |             |      |
|                     |                                           |                                           | 1.1                                           | 21.9      |                     |                                           |                                               |             |      |
| MCW0133             | 20859924 – 20860054                       | 21473824–21473954                         | 1.1                                           | 22.8      | MCW0133             | 21473824–21473954                         |                                               |             |      |
| CHR7_#14            | 21435690                                  | 22049676                                  |                                               |           | CHR7_#14            | 22049676                                  | 1.2                                           | 61.6        |      |
|                     |                                           |                                           | 0.0                                           | 26.6      |                     |                                           | 0.0                                           | 70.7        |      |
| CHR7_#15            | 21647789                                  | 22268282                                  |                                               |           | CHR7_#15            | 22268282                                  | 0.6                                           | 65.4        |      |
| <b>CHR7_#16</b>     | <b>21726140</b>                           | <b>22348862</b>                           |                                               |           | <b>CHR7_#16</b>     | <b>22348862</b>                           | <b>0.3</b>                                    | <b>69.8</b> |      |
| <b>CHR7_#2</b>      | 21783101                                  | 22411354                                  |                                               |           | <b>CHR7_#2</b>      | 22411354                                  | <b>0.0</b>                                    | <b>69.8</b> |      |
|                     |                                           |                                           | 0.0                                           | 26.1      |                     |                                           | <b>0.0</b>                                    | <b>69.8</b> |      |
| <b>Cp phenotype</b> | –                                         | –                                         |                                               |           | <b>Cp phenotype</b> | –                                         | <b>0.3</b>                                    | <b>66.9</b> |      |
|                     |                                           |                                           | 0.0                                           | 26.1      |                     |                                           | <b>0.0</b>                                    | <b>69.5</b> |      |
| <b>CHR7_#3</b>      | <b>21815955</b>                           | <b>22444190</b>                           |                                               |           | <b>CHR7_#3</b>      | <b>22444190</b>                           | 0.0                                           | 69.5        |      |
| CHR7_#4             | 21830848                                  | 22458582                                  |                                               |           | CHR7_#4             | 22458582                                  | 0.0                                           | 69.5        |      |
| CHR7_#17            | 21884855                                  | 22512418                                  |                                               |           | CHR7_#17            | 22512418                                  | 0.3                                           | 66.6        |      |
| CHR7_#18            | 21951698                                  | 22578237                                  |                                               |           | CHR7_#18            | 22578237                                  | 1.4                                           | 58.8        |      |
| MCW183              | 22208672–22208965                         | 22834668–22834961                         |                                               |           | MCW183              | 22834668–22834961                         | }                                             | 13.1        | 24.4 |
| CHR7_#11            | 23830947                                  | 24456802                                  | 7.3                                           | 16.3      |                     |                                           |                                               |             |      |
| ADL180              | 26581206–26581339                         | 27230408–27230541                         | 6.6                                           | 20.7      | ADL180              | 27230408–27230541                         |                                               |             |      |
|                     |                                           |                                           | 8.4                                           | 20.2      |                     |                                           | –                                             | –           |      |
| CHR7_#12            | 30424765                                  | 31088900                                  |                                               |           |                     |                                           | –                                             | –           |      |
|                     |                                           |                                           | 15.4                                          | 15.0      |                     |                                           | –                                             | –           |      |
| CHR7_#13            | 35185180                                  | 35875738                                  |                                               |           |                     |                                           |                                               |             |      |

**Supplementary Table 7** Primer pairs used for identifying the deletion in a candidate region of the *Cp* locus

| Primer name | Nucleotide sequence (5' to 3') | Nucleotide position<br>(Gallus_gallus-4.0) | Nucleotide position<br>(Gallus_gallus-5.0) | Size of PCR<br>product (bp) |
|-------------|--------------------------------|--------------------------------------------|--------------------------------------------|-----------------------------|
| #A_fd       | TTCTACAGAGCTTAGAGCAGCTGG       | 21766687–21766710                          | 22394939–22394962                          | 646                         |
| #A_rv       | ATGTTCTGCAGAAACGTCTCCTCC       | 21767332–21767309                          | 22395584–22395561                          |                             |
| #B_fd       | TTAATGAGCGCAAGGTAGCTGTGG       | 21771370–21771393                          | 22399622–22399645                          | 686                         |
| #B_rv       | AGTCTGGTTTTAGCACTGTGCAGC       | 21772055–21772032                          | 22400307–22400284                          |                             |
| #C_fd       | TCTTCGCTGTGGACGTTTCCTTTC       | 21775297–21775320                          | 22403549–22403572                          | 709                         |
| #C_rv       | TTAGCCGTGTGTACCGTACAGTC        | 21776005–21775982                          | 22404257–22404234                          |                             |
| #D_fd       | AAACCCAGAAGGGTTTGCAGTGTG       | 21780960–21780983                          | 22409213–22409236                          | 685                         |
| #D_rv       | AAACATGCACCAGAAAGAGGCAGG       | 21781644–21781621                          | 22409897–22409874                          |                             |
| #E_fd       | ATTCAGCAACCTGCTCCTGATTGG       | 21785847–21785870                          | 22414100–22414123                          | 632                         |
| #E_rv       | ACATGTCTCTTCAGTGGATGCCAG       | 21786478–21786455                          | 22414731–22414708                          |                             |
| #F_fd       | ATCACCTCTATCACCTCTCTCAGC       | 21790980–21791003                          | 22419233–22419256                          | 756                         |
| #F_rv       | TAACTGGAAAACAGAGCGAACGGG       | 21791735–21791712                          | 22419988–22419965                          |                             |
| #G_fd       | AAGGGCTCTTCAGCTGAAAGGTTG       | 21795295–21795318                          | 22423548–22423571                          | 779                         |
| #G_rv       | TTGAGAGAAAGCAGTGAGCCTGTG       | 21796073–21796050                          | 22424326–22424303                          |                             |
| #H_fd       | AAGCCATTGACCCAACCTCCTCATC      | 21801452–21801475                          | 22429440–22429463                          | 633                         |
| #H_rv       | AGTCAGACGTTTTGGGAAGGACTG       | 21802084–21802061                          | 22430072–22430049                          |                             |
| #I_fd       | TGAGGAAGGCTTTAATCAGGACCC       | 21809669–21809692                          | 22437793–22437816                          | 797                         |
| #I_rv       | TCTTCAAACCCAATGCCCTGGAG        | 21810465–21810442                          | 22438589–22438566                          |                             |
| #J_fd       | ATTGTTGGGTGAAGCACCTTCACC       | 21815259–21815282                          | 22443494–22443517                          | 674                         |
| #J_rv       | TCATGGTTCAGTCCTGGAATCTCC       | 21815932–21815909                          | 22444167–22444144                          |                             |
| #K_fd       | TTAATGCAAGGCAACAGCTGTGGG       | 21822337–21822360                          | 22450571–22450594                          | 935                         |
| #K_rv       | AAACAGTGATGAAGAACCGCGTGG       | 21823271–21823248                          | 22451505–22451482                          |                             |

**Supplementary Table 8** Primers used for amplifying nucleotide sequences in the deletion region of the *Cp* locus

| Primer name                                               | Nucleotide sequence (5' to 3') | Nucleotide position<br>( <i>Gallus_gallus</i> -4.0) | Nucleotide position<br>( <i>Gallus_gallus</i> -5.0) |
|-----------------------------------------------------------|--------------------------------|-----------------------------------------------------|-----------------------------------------------------|
| <b>5' Breakpoint</b>                                      |                                |                                                     |                                                     |
| DE_fd1                                                    | TTTGCACAGTACACATCTCTGGGC       | 21783611–21783634                                   | 22411864–22411887                                   |
| DE_fd2                                                    | ATATATCGGCAGGGTTTGTGTCCC       | 21784167–21784190                                   | 22412420–22412443                                   |
| DE_fd3                                                    | TTCGTTTTCTGGCAACATGCAGCTCC     | 21784652–21784677                                   | 22412905–22412930                                   |
| DE_fd4                                                    | TGTGGGCAATGAGGTTTGGTTTCC       | 21785304–21785327                                   | 22413557–22413580                                   |
| <b>578 bp region that remains in the <i>Cp</i> allele</b> |                                |                                                     |                                                     |
| Invwt_fd                                                  | AACCCTCGCTCCTGAAATCAGGGTGTG    | 21798578–21798605                                   | 22426831–22426858                                   |
| Invwt_rv                                                  | TCAAACAGAGCAGGGAGGCAGCTGGTTG   | Not applicable                                      | 22427037–22427010                                   |
| <b>3' Breakpoint</b>                                      |                                |                                                     |                                                     |
| IJ_fd1                                                    | ATTGATGGAAGGGAGCATTACCCC       | 21810835–21810858                                   | 22438959–22438982                                   |
| IJ_fd2                                                    | TCGTTGCAGAGACATCAGCAGTC        | 21811217–21811239                                   | 22439341–22439363                                   |
| IJ_fd3                                                    | TTCCTGAATGATGCCAGGCTGTTG       | 21811582–21811605                                   | 22439706–22439729                                   |
| IJ_fd4                                                    | TTGTTTACCTTCCCCATTGGCCTC       | 21811806–21811829                                   | 22439930–22439953                                   |
| IJ_fd5                                                    | TGAACTGCACTCCTAGATGCTACC       | 21812167–21812190                                   | 22440291–22440314                                   |
| IJ_rv1                                                    | AAATTCCTGGAGTGTGGCTCAGC        | 21810670–21810647                                   | 22438794–22438771                                   |
| IJ_delrv5                                                 | AAGCACTTGGCCTGTCAACATCCCTG     | 21811085–21811060                                   | 22439209–22439184                                   |
| IJ_delrv4                                                 | ACTGGATAAATCAGCTGCTCCTCC       | 21811397–21811374                                   | 22439521–22439498                                   |
| IJ_rv2                                                    | ATAGTGCTTAATCAGCCCTGAGGC       | 21811720–21811697                                   | 22439844–22439821                                   |
| IJ_delrv3                                                 | TTTGCACCCAACCTACCGTTTTGG       | 21811973–21811950                                   | 22440097–22440074                                   |
| IJ_delrv2                                                 | AAGAGCAAACATCCACGTGGACAC       | 21812334–21812311                                   | 22440458–22440435                                   |
| IJ_rv3                                                    | ATCAGAGCTGGATTAAGGTGTCCG       | 21812731–21812708                                   | 22440855–22440832                                   |
| IJ_delrv1                                                 | ATGGGACAACCTCCTCCTTCTG         | 21812939–21812918                                   | 22441063–22441042                                   |
| IJ_rv4                                                    | TTCCTCTTGCACCTCTTTGGCAC        | 21813656–21813633                                   | 22441780–22441757                                   |
| IJ_rv5                                                    | AACGGCTCCCACGTTTGTAAAGAAC      | 21814776–21814753                                   | 22443127–22443104                                   |

**Supplementary Table 9** Genotype-phenotype association between the 25 kb deletion (del) and the Creeper phenotype in F<sub>2</sub> progeny of a cross between the JB and GSP strains and 22 chicken strains and/or populations from 17 breeds

| Breed (line/population)                                    | Phenotype                     | No. of samples | Genotype |       |     |
|------------------------------------------------------------|-------------------------------|----------------|----------|-------|-----|
|                                                            |                               |                | del/del  | del/+ | +/+ |
| Japanese bantam (JB) (embryo) <sup>a</sup>                 | embryonic lethal <sup>b</sup> | 7              | 7        |       |     |
| Japanese bantam (JB) (chick)                               | Creeper                       | 20             |          | 20    |     |
|                                                            | wild-type                     | 18             |          |       | 18  |
| F <sub>2</sub> ( <i>Cp</i> /+ × <i>Cp</i> /+) <sup>c</sup> | Creeper                       | 118            |          | 118   |     |
|                                                            | wild-type                     | 57             |          |       | 57  |
| F <sub>2</sub> ( <i>Cp</i> /+ × +/+) <sup>c</sup>          | Creeper                       | 62             |          | 62    |     |
|                                                            | wild-type                     | 58             |          |       | 58  |
| Miyaji-dori                                                | Creeper                       | 2              |          | 2     |     |
|                                                            | wild-type                     | 1              |          |       | 1   |
| Jitokko                                                    | Creeper                       | 6              |          | 6     |     |
|                                                            | wild-type                     | 10             |          |       | 10  |
| Ehime-jidori (EJ)                                          | wild-type                     | 8              |          |       | 8   |
| Cochin bantam (CB)                                         | wild-type                     | 2              |          |       | 2   |
| Shokoku                                                    | wild-type                     | 3              |          |       | 3   |
| Polish bantam                                              | wild-type                     | 4              |          |       | 4   |
| Fayoumi (GSP)                                              | wild-type                     | 15             |          |       | 15  |
| Fayoumi (PNP/DO)                                           | wild-type                     | 15             |          |       | 15  |
| Fayoumi (GSN/1)                                            | wild-type                     | 8              |          |       | 8   |
| Fayoumi (YL)                                               | wild-type                     | 8              |          |       | 8   |
| Black Minorca (BM-C)                                       | wild-type                     | 4              |          |       | 4   |
| Brown Leghorn (BL-E)                                       | wild-type                     | 4              |          |       | 4   |
| Rhode Island Red (RIR-Y8/NU)                               | wild-type                     | 4              |          |       | 4   |
| New Hampshire (413)                                        | wild-type                     | 4              |          |       | 4   |
| Dandarawi (DD)                                             | wild-type                     | 4              |          |       | 4   |
| Japanese Silkie (SIL)                                      | wild-type                     | 8              |          |       | 8   |
| Albino (CAL)                                               | wild-type                     | 4              |          |       | 4   |
| White Leghorn (WL-G)                                       | wild-type                     | 4              |          |       | 4   |
| White Leghorn (M/O)                                        | wild-type                     | 4              |          |       | 4   |
| White Leghorn (OS)                                         | wild-type                     | 4              |          |       | 4   |
| Red junglefowl (RJF/NU)                                    | wild-type                     | 3              |          |       | 3   |

<sup>a</sup> Embryos were collected 12 – 15 days after the start of incubation

<sup>b</sup> All embryos were dead in the shell

<sup>c</sup> Genotyping was conducted for only hatched F<sub>2</sub> progeny obtained from mating between JB males and GSP females
