# Supplementary material for: Combined deletions of IHH and NHEJ1 cause chondrodystrophy and embryonic lethality in the Creeper chicken
Source: PubMed Central journal article supplement (PMC7096424; doi:10.1038/s42003-020-0870-z), 2020-03-25
Supplement: 42003_2020_870_MOESM2_ESM.pdf [file 42003_2020_870_MOESM2_ESM.pdf]

- 1 **Supplementary Data 1.** Genotypes of 119 probes from the SNP array in a candidate
- 2 genomic region of the Creeper trait in four chickens and/or embryos with three different
- 3 genotypes
